# Supplementary material for: The rostral intralaminar nuclear complex of the thalamus supports striatally mediated action reinforcement
Source: eLife. 2023 Apr 6;12:e83627. doi: 10.7554/eLife.83627 (PMC10079292; doi:10.7554/eLife.83627)
Supplement: Figure 1—figure supplement 1—source data 1. [file elife-83627-fig1-figsupp1-data1.xlsx]

## Sheet: Figure S1 A
Accomodation Index
	CM	PC	CL
	0.0138	0.0103	0.0292
	0.0546		0.0202
	0.0429	0.0317	0.0553
	0.0127	0.0185	0.0103
	0.019	0.0054
	0.0165		0.0365
			0.0663
	0.0164		0.016
	0.0302	0.0413	0.0376
	0.0135	0.0315	0.021
	0.0324		0.0337
		0.0074	0.028
	0.0287	0.0132
	0.0256	0.00041	0.017
	0.066		0.003
	0.0627
	0.0084
	0.0426

## Sheet: Figure 1 suppl 1 B
Post-hyperpolarization burst ISI (s)
	CM	PC	CL
	0.004663	0.007193	0.0113
	0.0045	0.0074	0.00735
	0.00565	0.007413	0.0071
		0.007477	0.006431
	0.00493	0.005933
	0.00615		0.0077
		0.0059	0.0055
	0.00836		0.012
	0.0066	0.007116	0.00622
		0.0046	0.0063
		0.006815	0.005778
	0.00595	0.006825	0.0055
	0.005767	0.03205	0.006642
	0.005185	0.00995	0.009653
	0.006103
	0.004327
	0.0155

## Sheet: Figure 1 Suppl 1 C
Post-hyperpolarization burst size (# of APs)
	CM	PC	CL
	4	6.333	3
	2.666	1.333	2
	3	5.333	2
	0	6.333	4
	1.66	3.5
	1.33		4.5
		3	3.5
	4		4
	5	6	6
	1	1.5	2
	0		0
	0	5.666	5.333
	3	4.666	4
	2.666	2.666	3.666
	6	2	5
	3.33
	3.66
	1.333
