# Supplementary material for: The rostral intralaminar nuclear complex of the thalamus supports striatally mediated action reinforcement
Source: eLife. 2023 Apr 6;12:e83627. doi: 10.7554/eLife.83627 (PMC10079292; doi:10.7554/eLife.83627)
Supplement: Figure 1—source data 1. [file elife-83627-fig1-data1.xlsx]

## Sheet: Figure 1D
Capacitance (pF)
	CM	PC	CL
	106.61	62.77	65.55
	119.59	92.44	52.24
	74.45	81.28	73.61
	63.37	50.17	65.37
	93.9	93.55
	108.86		66.49
		76.26	84.68
	76.21		101.86
	95.48	107.55	73.43
	64.75	88.79	98.89
	54.54		99.36
	67.88	62.43	72.81
	68.77	66.06	88.92
	70.58	64.71	70.17
	102.73	74.4	71.47
	160.21
	76.02
	79.58

## Sheet: Figure 1E
Membrane Resistance (Mohm)
	CM	PC	CL
	214.5	370	253.7
	262.6	149.7	135.9
	146.9	130.7	110.1
	407.2	478.9	353.9
	188.6	105.8
	225.4		353.9
		320.1	219.3
	313.1		241.5
	306.5	576.8	158.6
	116.4	247.3	95.8
	179.3		246.1
	110	387.7	255.5
	312.9	387.8	234.3
	628	261.9	184
	183.1	161.8	253.9
	282.8
	812
	285.7

## Sheet: Figure 1F
Input Resistance (Mohm)
	CM	PC	CL
	125.786	171.57	180.5
	128.643	150	113.571
	68.4286	86.07	74.36
	181.14	161.93	135.14
	104	67.14
	114.43		130.786
		171.79	78.5
	127.071		94.8571
	102.214	82.43	184.214
	90	80.43	72.7857
	144.714		226.5
	74.7857	135.14	101.36
	161.929	101.79	124.5
	226.5	138	109.21
	149.07	100.5	116.43
	146.93
	296.86
	100.07

## Sheet: Figure 1G
Resting Membrane Potential (mV)
	CM	PC	CL
	-63.47	-60.43	-55.95
	-61.26	-61.46	-51.36
	-52.52	-55.21	-56.48
	-58.97	-63.86	-62.16
	-59.31	-58.08
	-55.05		-63.64
		-56.5	-57.21
	-56.63		-64.59
	-62.77	-70.49	-61.43
	-60.08	-61.83	-54.56
	-63.91		-68.01
	-63.96	-59.94	-54.33
	-55.87	-53.56	-67.06
	-60.39	-50.15	-63.57
	-52.39	-50.37	-51.62
	-55.41
	-68.36
	-58.01

## Sheet: Figure 1H
AP Threshold (mV)
	CM	PC	CL
	-36.618	-42.09	-36.49
	-41.944	-36.82	-41.89
	-30.428	-34.66	-35.932
	-36.622	-41.69	-37.554
	-33.17	-44.71
	-33.26		-39.532
		-39.58	-36.216
	-34.708		-41.096
	-39.294	-43.7	-33.594
	-39.824	-30.46	-36.062
	-40.02		-44.46
	-33.008	-42.87	-34.076
	-35.554	-38.99	-37.926
	-40.556	-39.9	-48.52
	-32.934	-32.76	-43.29
	-35.25
	-38.9
	-31.73

## Sheet: Figure 1I
Maximum Firing Rate (Hz)
	CM	PC	CL
	230.769	194.2	76.2
	181.818	88.9	165.29
	97.6	142.5	107.1
	114.72	186.9	170.9
	143.5	128.8
	110.1		164.83
		125.3	187.5
	132.45		113
	153.1	212	193.55
	113.85	136.4	122.199
	154.24		194.2
		173.4	166.2
	100.3	170.5	153.1
	119.5	139.9	170
	116.7	112.1	176
	90.2
	179.6
	90.1
