# Supplementary material for: The rostral intralaminar nuclear complex of the thalamus supports striatally mediated action reinforcement
Source: eLife. 2023 Apr 6;12:e83627. doi: 10.7554/eLife.83627 (PMC10079292; doi:10.7554/eLife.83627)
Supplement: Figure 2—source data 1. [file elife-83627-fig2-data1.xlsx]

## Sheet: Figure 2C
rILN Photometry Signal Z-Score
	FR1 -1.5s	FR1 0s	FR5-NTL -1.5s	FR5-NTL 0s	FR5-5s -1.5s	FR5-5s 5s
	-0.2067	0.414102	-0.00053	0.110707	-0.09366	0.235747
	-0.46734	-0.01155	-0.47939	-0.06845	-0.3595	-0.20083
	0.0311	0.060825	0.00971	0.347995	-0.00101	0.245344
	-0.06898	0.14999	-0.02355	0.29371	0.354223	0.866987
	-0.15705	0.351963	-0.36362	0.360294	0.29371	0.315652
	-0.12206	0.140313	-0.12654	0.143876	0.21108	0.172821
	0.124466	0.009907	-0.02767	0.239957	-0.0047	0.218068
	-0.00127	-0.13152	0.089277	-0.00951	0.040249	0.022756
	-0.27807	-0.09516	-0.0948	0.028706	0.172903	0.312278
	-0.03416	0.1904	-0.00799	0.34829	0.313504	0.569047
	-0.22191	0.174842	-0.00799	0.34829	0.169882	0.245252
	0.018392	-0.20941	0.227079	0.220558	0.147893	0.373245
	-0.05073	-0.14706	0.069345	0.478835	0.025217	0.168158

## Sheet: Figure 2F
rILN Photometry Signal Z-Score - Press in FR5 sequence
	FR5-NTL					FR5-5s
	2nd	3rd	4th	5th		2nd	3rd	4th	5th
	0.119133	-0.05787	0.087339	-0.30165		-0.11829	-0.10203	0.043243	0.029053
	0.201076	0.24763	0.199183	0.182557		-0.1859	-0.22154	-0.17539	-0.12235
	-0.15651	0.117873	-0.07688	0.101877		-0.26893	-0.08058	-0.15424	-0.24779
	0.177867	0.140712	0.310331	0.390086		-0.24396	-0.22136	-0.23333	-0.08196
	0.031657	0.177997	0.301537	0.190469		0.08261	-0.19894	-0.28305	-0.12798
	-0.2762	-0.30195	0.023234	-0.14598		-0.8269	-0.66396	-0.50154	-0.24955
	-0.09396	0.04245	0.0832	0.162173		-0.32142	-0.3608	-0.1598	-0.17098
	0.215532	0.237109	0.275851	0.121293		0.111524	0.080524	0.060173	-0.07288
	-0.0806	0.128334	-0.0321	0.087738		-0.02158	-0.00902	0.035446	-0.04068
	0.195289	0.460528	0.476716	0.470365		-0.19084	-0.19506	-0.22759	-0.40627
	0.028507	-0.04784	-0.001	0.091639		-0.09346	-0.18703	-0.25728	-0.30061
	0.131156	0.123637	0.064272	0.189611		-0.09144	-0.10377	-0.15157	-0.12488
	0.335727	0.376179	0.506816	0.549713		-0.12029	0.094973	0.19596	0.054014

## Sheet: Figure 2G
rILN Photometry Signal Z-Score
	FR1 -1	FR1 0.5	FR5-NTL -1	FR5-NTL 0.5	FR5-5s -1	FR5-5s 0.5
	0.080912	0.016016	0.241117	0.097451	0.054623	0.115228
	0.123005	-0.24183	-0.07505	-0.01167	0.11175	0.430653
	0.153811	-0.05016	0.044462	0.017347	0.164391	0.393142
	-0.21414	-0.17453	0.17663	0.329467	0.207019	0.467761
	-0.12244	0.092603	0.456213	0.493773	0.161309	0.361849
	-0.01742	0.09358	0.127347	0.631961	0.019951	0.473333
	-0.22008	-0.06637	0.02939	0.01125	-0.00401	0.213904
	-0.21953	-0.38959	-0.47754	0.005717	-0.43656	0.23901
	-0.07476	0.017577	0.041274	0.274005	-0.07195	0.173683
	-0.17434	0.014624	-0.16708	0.225912	0.31341	1.06225
	-0.24302	-0.14529	-0.31859	0.037998	0.192996	0.567001
	-0.12374	-0.05736	-0.13293	0.023192	0.04857	0.337614
	-0.03943	-0.08986	0.070215	0.13901	-0.01161	0.196254

## Sheet: Figure 2H
rILN Photometry Signal Z-Score
	FR1	FR5-NTL	FR5-5s
	9.04609	1.67725	1.21974
	9.96279	2.08261	0.502874
	11.712	3.00833	0.995
	7.73212	1.72	0.569925
	10.155	2.09667	0.453238
	8.33211	1.49061	1.04809
	8.60933	1.77857	0.653684
	6.0269	1.58783	0.671783
	9.34739	1.58218	0.787024
	9.2234	2.05486	0.762183
	8.15719	1.73125	0.655644
	7.04924	2.18113	0.866279
	7.33129	1.96828	0.652208

## Sheet: Figure 2I
rILN Photometry Signal Z-Score
	Comp -1.5s	Comp 0s	Incomp. -1.5s	Incomp. 0s
	0.153433	-0.01936	0.024754	-0.06917
	0.196625	0.275894	-0.01894	0.06535
	0.319683	0.40955	0.088355	0.140746
	0.312474	0.40018	0.065959	0.227132
	0.141325	0.346891	0.11347	0.443447
	0.025217	0.168158	0.152789	0.113453
	-0.14685	0.18859	0.033125	0.073862
	-0.49758	-0.20355	-0.14609	-0.01668
	-0.00141	0.239367	-0.10335	0.246057
	0.362519	0.881944	0.240738	0.405126
	0.214491	0.180508	0.210168	0.28756
	0.161864	0.117841	-0.1244	0.199099
	-0.0047	0.218068	0.042119	0.021456
