# Supplementary material for: The rostral intralaminar nuclear complex of the thalamus supports striatally mediated action reinforcement
Source: eLife. 2023 Apr 6;12:e83627. doi: 10.7554/eLife.83627 (PMC10079292; doi:10.7554/eLife.83627)
Supplement: Figure 3—figure supplement 1—source data 1. [file elife-83627-fig3-figsupp1-data1.xlsx]

## Sheet: Figure 3 Suppl 1 B
Latency to reward retrieval (s)
	Paired Tone	Unpaired Tone
	0.4	1.905
		2.14
	0.315
	0.31	1.925
		1.92
	0.23	1.98
	0.08	2.66
	0.17

## Sheet: Figure 3 Suppl 1 C
rILN Photometry Signal Z-Score: Tone-paired cohort
	-1s early	+1s early	-1s late	+1s late
	0.049123	0.062737	-0.15655	-0.22665
	-0.07048	-0.14261	-0.05364	-0.09255
	-0.01699	0.017456	0.023037	0.008427
	0.162739	0.058133	0.015081	0.026022
	-0.22399	-0.32533	-0.3853	-0.20935
	0.188246	0.030704	0.126227	-0.07101

## Sheet: Figure 3 Suppl 1 D
rILN Photometry Signal Z-Score: Non-paired tone cohort
	-1s early	+1s early	-1s late	+1s late
	0.074373	-0.12529	-0.05341	0.156265
	0.073013	0.074222	0.030803	0.059278
	-0.14498	-0.04878	0.085644	0.021203
	0.198668	-0.07521	0.017832	0.128549
	0.116012	0.12861	0.024932	-0.07966
	-0.04106	-0.1726	-0.00047	-0.10716

## Sheet: Figure 3 Suppl 1 F
Completed trials in 30 minutes
	Reinfor.	Unreinfor.
	68	3
	29.6	3
	44.3	4
	59.5	1
	46.5	0
	41.5	5
	45.6	4
	36.3	1
	33	5
	47.3	2
	25.6	5
	48	0

## Sheet: Figure 3 Suppl 1 G
rILN Photometry Signal Z-Score
	100% Reinfor. -1.5s	100% Reinfor. 0s	0% Reinfor. -1.5s	0% Reinfor. 0s
	0.077704	0.06928	-0.08891	-0.36779
	0.143902	0.231588	0.507016	0.598868
	0.204454	0.321205	0.070882	0.37694
	0.032716	0.474791	0.551133	0.528607
	0.36446	0.307439	0.476994	0.567439
	-0.28122	-0.0888	-0.18183	0.209264
	0.198993	0.057973	-0.00695	0.129244
	0.257997	0.736967	0.177079	0.564181
	0.117935	0.360465	-0.04904	0.296384
	-0.08183	0.169988	-0.2495	0.344121
	-0.13671	0.287097	-0.13057	0.21512
	0.071056	0.247128	0.14563	-0.05497

## Sheet: Figure 3 Suppl 1 H
Completed trials in 30 minutes
	100% Reinfor.	50% Reinfor.
	33	57.3
	36.4	33.2
	43.25	42.25
	27	20.63
	52.5	54.25
	52.75	58.25
	61.5	62.75
	56	43.5
	45.75	42.5
	31.5	36
	28	43.75

## Sheet: Figure 3 Suppl 1 I
rILN Photometry Signal Z-Score
	-1.5 s 100% Reinfor.	0 s 100% Reinfor.	-1.5 s 50% Reinfor.	0 s 50% Reinfor.
	0.028295	0.195585	0.24973	0.316604
	0.085473	0.03435	0.054543	0.050453
	0.088872	0.094718	0.150775	0.1414
	-0.0558	0.150561	-0.21254	0.184286
	0.030526	0.354374	0.13419	0.406546
	-0.00326	0.048576	-0.00779	0.125288
	0.086005	0.127813	-0.08711	0.111723
	0.174275	-0.10819	0.038942	-0.07363
	0.094018	0.187079	0.187554	0.230253
	0.289413	0.473641	0.330079	0.485422
	-0.08333	0.14046	-0.13004	0.039164
