# Supplementary material for: The rostral intralaminar nuclear complex of the thalamus supports striatally mediated action reinforcement
Source: eLife. 2023 Apr 6;12:e83627. doi: 10.7554/eLife.83627 (PMC10079292; doi:10.7554/eLife.83627)
Supplement: Figure 3—source data 1. [file elife-83627-fig3-data1.xlsx]

## Sheet: Figure 3B
rILN Photometry Signal Z-Score
	FR1 -0.5	FR1 0.5	FR5-5s -0.5	FR5-5s 0.5
	0.196028	0.464801	0.01777	0.547246
	-0.09611	0.26103	-0.08215	0.263484
	-0.01307	0.397378	-0.25849	0.112778
	-0.1108	0.356201	-0.18504	0.057311
	0.447967	0.567787	-0.26302	0.431956
	0.402143	0.875767	-0.52604	0.604047
	0.319188	0.73064	-0.21122	0.641471
	0.049847	0.160871	-0.14509	0.021346
	0.230635	0.433546	0.123134	0.594254
	0.317788	0.67699	-0.15269	0.235133
	0.049177	0.645347	-0.32869	0.25922
	0.089115	0.536	-0.18933	0.197406
	0.049337	-0.02758	0.211094	0.407919

## Sheet: Figure 3C
	Reward latency (s)	Photometry Signal AUC reward epoch
	0.99	-2.62542
	1.46	-14.7201
	1.29	-18.5777
	1.51	-34.1188
	0.86	-35.0472
	0.96	-1.09489
	1.1	19.8298
	1.13	1.27128
	0.85	-5.68295
	0.99	-1.16543
	0.76	8.53357
	1.16	-21.1981
	1.08	-3.4924
	0.64	1.27357
	0.71	-15.2926
	0.62	-2.40237
	1.26	-9.29777
	0.76	-5.63828
	0.76	-24.2719
	0.88	1.76949
	0.96	16.4888
	1.13	27.1592
	0.78	11.9633
	1.09	-7.7613
	0.97	-8.7165
	1.45	-12.3634
	1.33	-13.0215
	0.72	-27.7157
	1.04	14.9494
	0.62	19.4254
	0.65	13.2202
	0.83	-21.1545
	0.75	31.579
	1.29	6.94299
	1.18	-3.33516
	1.26	-8.52001
	0.75	-22.1164
	0.96	6.79625
	1.61	27.4237
	4.41	12.682
	1.45	9.79265
	1.35	-6.71868
	0.48	-7.75467
	0.62	-38.8456
	0.61	24.0653
	0.5	8.85426
	0.81	21.1509
	1.29	8.43215
	0.72	-0.7048
	0.93	-32.574
	0.67	17.1422
	0.54	12.8136
	1.36	0.30072
	0.7	-17.4336
	0.97	-24.9554
	0.56	8.15734
	1.05	13.943
	0.52	2.93863
	8.46	13.206
	1.07	-27.8744
	0.54	11.1822
	1.23	4.77949
	0.62	10.1296
	1.68	-11.2887
	0.55	-10.8797
	1.32	4.08927
	1.2	6.7345
	1.5	22.8301
	0.59	-12.3188
	1.19	-19.2567
	1.41	-18.5413
	1.12	8.93378
	0.99	32.7878
	1.15	-36.8984
	0.77	-29.0107
	1.2	16.2836
	1.02	6.32071
	1.07	38.9452
	1.55	24.9805
	1.12	-27.0673
	1.35	-6.87689
	1.34	13.5257
	1.05	-40.9124
	1.01	12.463
	1.26	11.0968
	0.79	37.2202
	0.77	-12.5608
	1.29	16.9425
	1.03	-13.7717
	1.78	-10.7894
	1.1	9.29377
	0.64	0.110291
	1.33	-4.13469
	0.42	1.05632
	0.86	5.50952
	1.67	-8.03412
	0.72	-19.3307
	0.86	4.01292
	1.17	-19.8071
	1.63	10.5013
	0.85	5.89228
	1.04	-11.1876
	0.84	13.1459
	1.06	-31.4576
	0.72	16.434
	1.37	-8.39461
	1.51	19.1938
	1.72	4.01661
	1.4	-17.5866
	1.3	5.84259
	1.32	28.86
	1.01	4.33342
	1.45	9.8651
	1.56	11.4732
	1.03	-28.8831
	0.76	-11.5726
	0.8	11.7457
	0.64	20.9774
	1.37	29.3483
	0.87	19.9214
	0.76	-7.32757
	1.16	-6.16447
	0.93	2.77169
	1.35	19.6395
	2.38	23.7795
	1.03	-8.18753
	1.22	6.03339
	1.39	-0.29892
	1.4	12.4765
	1.43	12.1205
	1.16	8.02994
	0.7	-9.14298
	1.36	-6.24968
	1.28	0.074492
	1.97	-5.14155
	1.15	23.6665
	1.05	-5.36353
	1.14	5.05356
	1.58	18.5729
	1	25.4194
	0.74	-6.87216
	1.51	0.658268
	0.86	-16.8157
	1.2	22.1297
	1.2	-10.0825
	0.77	-0.32496
	0.81	4.45747
	1.33	-16.403
	1.2	19.5436
	0.66	22.1454
	0.96	-19.3664
	1.3	25.5729
	1.06	27.635
	1.12	19.2106
	1.4	11.0469
	1.44	22.1335
	0.81	17.623
	1.04	15.1898
	1.7	5.11916
	0.95	-2.05325
	1.31	-0.59393
	1.09	18.0226
	1.12	38.7179
	0.94	23.0816
	1.43	-4.97471
	1.68	-4.98709
	1.04	17.5533
	1.18	5.53621
	0.94	7.38955
	1.5	3.12853
	2.82	-1.92269
	1.09	6.04997
	0.95	18.722
	1.55	-6.20191
	1.31	18.8687
	1.62	12.8345
	1.17	-18.1474
	1.32	8.00773
	1.44	-5.71976
	2.63	21.615
	1.17	20.745
	1.28	18.4906
	1.2	-1.98103
	1.35	1.49651
	1.29	36.776
	1.3	10.4861
	1.16	-10.2203
	1.39	30.4868
	0.98	23.836
	1.27	8.84432
	1.04	17.0143
	1.56	27.1867
	1.31	28.7534
	1.72	13.1614
	1.08	9.26152
	2.18	5.9175
	1.29	30.4785
	0.96	21.8889
	1.69	28.9641
	1.87	24.6324
	1.03	5.94724
	1.13	14.8428
	1.36	19.173
	1.12	9.66396
	1.22	29.703
	1.63	24.1228
	0.85	23.9238
	0.97	34.8054
	1.19	-3.29295
	1.08	6.06957
	0.77	6.13037
	1.27	23.7971
	7.37	0.967837
	1.6	8.62334
	1.12	-34.1561
	1.38	16.6178
	1.21	18.3472
	0.97	29.0699
	1.27	8.68275
	1.49	34.9339
	1.01	20.5089
	1.19	-20.6792
	0.84	9.32883
	1.21	21.5605
	0.94	25.4051
	0.89	39.9098
	1.05	23.1814
	0.97	-9.65666
	0.64	-16.9721
	0.93	-11.8952
	1.6	16.5995
	1.04	12.9344
	1.02	-0.53461
	1.32	23.6834
	1.12	13.6134
	1.2	-32.9586
	1.19	8.08364
	1.4	8.94324
	1.38	-8.93875
	1.19	0.939841
	1.79	-5.28423
	1.07	-5.33769
	0.93	27.7717
	7.46	8.57371
	1.08	17.7978
	0.97	22.0443
	1.04	-20.9161
	1.13	-2.65991
	1.03	8.60532
	0.97	-13.4983
	1.3	-10.2565
	0.76	9.00339
	1.2	21.7542
	1.16	9.17788
	0.57	22.8893
	1.41	30.5149
	0.74	19.843
	0.94	30.735
	0.93	6.16252
	1.11	21.465
	1.67	-18.6387
	1.02	-1.31074
	1.16	22.0963
	0.91	-10.5471
	0.8	-38.2455
	0.88	26.9553
	1.21	33.3515
	1.14	2.9272
	1.06	-10.0809
	0.6	15.0632
	1.39	2.96454
	0.57	-6.43966
	0.67	-0.21575
	0.68	3.07897
	0.99	-10.292
	0.79	-24.4116
	0.77	-23.9775
	0.81	-17.4631
	0.84	43.7601
	1.29	22.625
	1.11	25.1925
	1.23	20.6087
	0.84	-14.8587
	1.01	-11.5263
	1.38	5.22165
	0.58	13.6037
	1.25	0.32221
	0.92	24.5435
	0.93	21.3344
	1.53	13.764
	0.76	8.0799
	0.86	39.6447
	1.11	11.4237
	1.41	1.97356
	0.64	12.0192
	9.32	20.9219
	0.53	-10.6097
	0.74	-43.4552
	3.95	7.42863
	0.73	20.2972
	0.97	1.50538
	0.71	12.1069
	0.73	10.3159
	1	11.9515
	0.74	34.9155
	0.64	-13.7804
	9.07	-3.65753
	8.45	-13.0602
	0.66	3.22151
	8.79	1.13135
	8.9	15.7775
	8.2	1.25309
	0.58	-12.4841
	1.11	-6.08505
	1.14	5.07177
	0.53	8.09744
	1.05	-15.4689
	1.07	30.0646
	0.85	26.329
	0.7	20.4407
	0.54	-12.3383
	2.06	9.71021
	0.83	-20.897
	0.93	-18.5654
	1.12	22.3115
	0.31	9.91319
	0.69	45.3728
	1	1.74497
	0.82	-16.0855
	1.17	7.25376
	0.55	-27.2062
	0.79	8.25257
	0.68	-37.915
	0.71	13.9268
	1.44	-19.7141
	0.68	-12.0563
	0.85	-3.48517
	0.89	15.254
	0.99	5.12364
	0.57	14.8525
	0.77	4.90559
	1.17	20.3329
	0.86	9.41435
	0.58	18.9813
	0.58	14.4901
	0.96	18.5766
	1.66	24.5213
	1.16	21.4719
	0.8	33.4301
	0.47	22.8667
	0.71	3.05751
	0.6	-9.64439
	0.72	-15.737
	0.87	-23.5701
	1.11	31.7265
	1.11	34.7491
	0.71	-14.568
	1.12	-11.912
	0.89	31.0583
	1.04	19.9114
	1.11	-8.52962
	0.52	6.58012
	0.77	-8.72247
	0.71	3.69313
	1.02	-9.23785
	0.82	3.3751
	0.74	-18.3388
	0.71	18.0925
	0.73	-0.40859
	0.98	18.6583
	1.1	23.72
	0.64	3.35147
	1.18	-13.8469
	0.88	12.3248
	0.56	12.5792
	0.99	-8.25668
	0.84	-6.41386
	0.47	6.7676
	0.72	-1.67735
	0.59	-0.93465
	0.64	-6.20552
	0.64	18.3737
	0.64	11.0178
	1.67	34.696
	1.07	20.0552
	0.95	37.7714
	0.93	6.71273
	1.02	14.5372
	2.82	8.26248
	1.1	3.18618
	1.47	11.9934
	1.09	7.62176
	0.65	7.97619
	0.92	-1.99516
	0.62	-14.2712
	0.83	-11.622
	1	33.3
	0.72	8.74139
	0.98	10.3596
	0.61	21.6869
	0.63	-2.70594
	0.62	-8.22114
	1.12	36.7074
	0.76	-4.92353
	0.45	19.5932
	1.79	15.1942
	0.65	-11.9166
	0.74	-11.0574
	0.46	12.6443
	1.23	30.6468
	0.45	25.9739
	0.54	27.9212
	0.47	21.0653
	0.7	28.299
	0.66	23.7065
	0.68	-1.73154
	0.48	33.0628
	0.55	5.47012
	0.51	43.7064
	0.41	12.8309
	0.68	-4.92983
	0.52	23.3747
	0.72	3.37252
	1.12	21.2412
	0.67	40.9226
	0.99	23.2923
	0.66	11.1511
	0.86	22.4268
	0.65	-34.867
	0.93	0.931891
	0.62	3.40611
	1.29	22.0938
	0.82	24.2128
	1.2	-11.8116
	0.54	15.5611
	0.89	29.1397
	0.65	-6.03441
	0.81	26.6277
	0.55	9.2902
	0.64	8.00282
	1.2	55.1863
	0.52	-1.4257
	1.08	13.8119
	0.56	-5.65057
	1.09	-5.72761
	1.5	31.3324
	1.81	29.8441
	1.08	30.8129
	0.61	24.4623
	1.16	40.016
	1.08	-1.48942
	0.55	22.6149
	0.57	7.58085
	0.72	9.17309
	0.82	9.48864
	0.46	21.5684
	0.68	18.2432
	0.57	3.32036
	0.84	32.4077
	0.61	29.4679
	0.99	29.419
	0.48	8.09677
	0.85	16.8574
	0.52	7.8503
	0.92	17.1665
	0.72	13.901
	1.03	21.2704
	1.34	27.732
	0.78	12.0412
	1.6	0.944237
	0.51	17.6145
	0.83	-15.2402
	0.83	-9.99367
	0.65	-4.06088
	0.49	14.5523
	0.53	25.5134
	0.61	-16.5611
	0.76	11.5564
	0.59	4.9379
	0.72	20.4481
	0.48	19.0603
	0.45	18.9425
	0.61	14.5906
	0.91	-13.8176
	0.74	-5.48374
	1.02	18.9964
	0.59	33.3432
	0.68	8.60385
	1.15	6.17183
	0.88	13.0576
	0.75	20.1578
	0.68	0.835348
	0.47	7.8645
	0.76	27.4325
	0.55	11.5806
	1.15	8.05837
	0.49	-0.45389
	6.96	-9.6306
	0.28	28.6157
	0.57	3.57736
	0.59	4.94499
	1.16	28.3662
	0.47	0.308375
	0.51	4.40475
	0.62	-18.8401
	0.65	-5.01262
	0.69	10.5623
	0.7	23.9655
	0.73	-8.6773
	0.53	-23.7862
	0.67	-0.93058
	1.76	11.1113
	1.14	25.4751
	0.89	25.7692
	0.65	-2.47107
	0.62	9.47918
	1.28	18.1603
	1.3	-12.6905
	1.28	-35.27
	0.92	6.63399
	0.62	13.9142
	2.6	-5.41998
	1.15	-7.76781
	1.05	8.7496
	1.18	27.0725
	1.06	34.6364
	1.26	3.46376
	0.82	51.869
	2.11	-0.60941
	0.49	16.6749
	1.58	35.1891
	1.47	10.0372
	1.04	19.8908
	1.37	31.3656
	0.68	-3.85506
	0.94	-0.86247
	1.4	13.7925
	0.97	6.36279
	1.68	12.8034
	1.42	24.0011
	0.91	2.62964
	0.49	-5.62049
	1.25	3.14804
	0.99	9.57314
	0.82	9.31426
	0.89	9.81479
	0.95	16.077
	0.88	33.0282
	1.21	9.86732
	1.14	14.2015
	1.13	29.1327
	1.13	14.5958
	1.45	25.1509
	1.63	18.0685
	0.88	16.7207
	1.1	-0.30793
	0.7	16.3811
	1.08	18.6047
	0.88	7.94081
	1.06	-9.47616
	0.97	20.6967
	0.73	0.257642
	1.08	32.7835
	1.18	7.9368
	1.39	2.59733
	5.37	8.97393
	1.52	18.3308
	1.06	25.7907
	1.72	26.8923
	0.73	-22.2243
	1.24	18.2614
	1.45	9.21374
	0.61	17.0235
	1.33	30.5231
	1.34	1.25822
	0.96	14.2176
	1.14	4.21608
	1.27	28.6491
	6.69	3.43216
	2.57	30.6211
	0.84	-11.2497
	1.24	25.8722
	1.38	-39.7294
	1.12	20.6079
	1.72	13.0839
	1.02	20.0917
	1.07	-25.5666
	1.36	2.99985
	1.19	6.58365
	0.81	-5.36743
	1.04	23.3534
	1.29	29.6298
	1.79	19.7183
	1.05	24.1502
	0.83	14.7437
	1.62	15.6375
	1.24	23.4635
	0.88	2.02701
	1.37	-3.99902
	0.58	32.7207
	1.62	6.02653
	1.23	23.3614
	0.78	30.3825
	1.84	2.14993
	1.33	22.6156
	1.87	2.1428
	1.53	13.8504
	0.99	25.731
	1.1	-9.26091
	1.29	22.8382
	1.42	27.1109
	1.44	38.9045
	1.81	9.52385
	0.8	6.16263
	1.42	15.796
	1.78	20.2538
	1.57	7.90688
	1.39	-3.70292
	1.76	44.1757
	1.04	12.2196
	1.33	16.6363
	6.25	-12.6174
	1.26	30.6929
	0.97	30.5971
	1.75	32.7632
	1.36	4.08793
	1	22.813
	1.39	24.1011
	1.36	31.2291
	1.31	28.8197
	1.03	9.51828
	1.58	11.7894
	0.91	21.2734
	2.13	26.9132
	1.61	26.3033
	1.23	8.86457
	1.16	16.466
	1.43	-9.25827
	0.9	-9.31619
	1.36	-28.6064
	1.03	30.427
	1.47	-2.02507
	1.76	-13.0323
	1.46	23.2588
	2.05	10.1221
	1.64	46.6519
	1.9	9.38041
	1.76	17.7193
	1.41	23.5705
	1.55	8.11307
	1.13	1.61044
	1.44	13.0171
	1.36	33.1976
	1.58	30.8549
	1.55	11.1103
	1.33	7.44605
	2.52	-14.5821
	1.42	-20.6809
	1.63	-29.5952
	1.33	27.0075
	1.62	2.5467
	2.59	25.769
	1.23	-19.3967
	1.51	10.6522
	1.28	-18.0286
	1.82	12.9567
	2	1.39495
	1.1	47.5911
	5.45	13.9983
	1.22	-9.85969
	2.19	3.27316
	1.56	1.64724
	1.93	-16.3698
	1	-23.5385
	1.55	-5.53863
	2	-6.85272
	1.43	8.76926
	1.02	-18.1055
	1.28	4.84747
	0.95	0.171495
	1.02	59.5811
	1.66	3.36708
	1.36	-23.2149
	1.73	-9.73501
	0.83	0.841252
	0.66	-8.0652
	0.76	0.316355
	1.15	-1.74927
	1.43	24.6754
	1.98	-13.4603
	1.53	-18.5464
	1.42	-23.125
	2.48	-8.54449
	2.48	-20.3532
	1.03	-12.6982
	1.2	-7.57777
	1.62	-20.2245
	1.15	-14.4448
	1.04	-1.93098
	0.77	-0.75811
	0.78	-2.65079
	0.97	11.4833
	0.92	-13.3662
	0.88	1.26699
	0.97	-9.65758
	1.1	39.0938
	4.13	24.6607
	1.21	-12.5179
	0.97	-17.763
	0.75	26.7334
	1.08	-8.0745
	1.14	0.017998
	0.82	5.55478
	1.37	-12.7164
	1.34	-35.4793
	0.82	-9.28841
	0.94	-22.4205
	0.79	-14.7539
	0.79	-26.9977
	1.17	-10.7671
	0.85	35.774
	2.08	35.4999
	1.7	19.4518
	1.99	1.22864
	1.67	-19.7165
	1.73	-3.64117
	0.37	2.19354
	1.51	-1.75947
	2.54	10.7373
	1.43	-2.03355
	0.86	-12.6448
	1.04	-6.39535
	0.92	13.5058
	0.88	-4.76105
	0.61	6.81264
	0.97	-0.389
	1.12	0.377844
	1.39	11.1886
	1.1	24.3041
	1.04	-48.896
	1.81	-5.65253
	0.99	-22.6722
	0.93	-18.6176
	0.91	14.917
	0.79	-24.7663
	0.69	14.2011
	0.96	14.0755
	0.87	20.5025
	2.2	2.2596
	0.78	-20.0873
	0.78	-2.62314
	0.94	7.85157
	0.75	33.6392
	0.84	-0.45013
	0.88	-28.2217
	1.11	-15.4329
	1.45	12.2521
	0.8	-19.2506
	0.54	5.5674
	0.71	-22.9912
	1.16	12.6847
	1.22	55.0534
	1.76	-0.9509
	0.97	-13.1349
	0.9	5.56202
	1.2	-3.30427
	1.78	-2.20583
	1.42	-3.98614
	0.81	-5.04089
	0.69	-0.23555
	0.91	5.15112
	1.28	-6.52501
	1.26	18.4592
	0.82	16.8512
	0.52	2.7192
	0.97	2.51425
	0.75	-10.7367
	1.19	-17.9045
	0.65	-15.4083
	0.76	-1.73553
	0.68	-7.22952
	0.56	1.47043
	0.64	-8.60255
	0.91	5.79575
	0.61	-17.8212
	0.91	-10.363
	0.6	-12.0893
	0.83	17.8516
	1.17	9.3751
	1.45	-22.4437
	0.84	-9.38617
	1.58	31.8262
	1.33	-12.8466
	1.53	-7.71963
	0.49	-36.4851
	0.85	10.3006
	1.74	-6.44541
	0.48	-3.31726
	1.05	-48.9165
	0.87	9.95638
	0.71	-30.1589
	1.14	-12.5999
	0.35	-30.2716
	1.15	-33.1809
	1.68	-7.61233
	1.62	-1.03206
	1.09	-5.08492
	1.53	2.88646
	1.53	-23.4869
	1.65	-16.0512
	1.77	-3.24721
	0.79	20.338
	1.25	13.576
	0.76	-13.0544
	1.32	-21.6886
	0.97	-8.715
	1.06	-23.5964
	0.74	-9.26792
	1.83	11.8639
	1.21	11.8142
	1.02	4.7632
	1.29	21.963
	0.88	-9.32716
	0.99	3.41586
	1.25	9.86177
	0.56	8.26488
	0.99	2.14783
	0.66	-14.4205
	1.31	-24.5705
	1.28	0.018145
	1.07	3.3331
	0.97	9.85105
	1.17	-5.27157
	1.21	-14.1799
	0.96	-7.2097
	1.64	-22.8481
	1.59	-21.8425
	1.02	-2.01243
	1.42	-20.7975
	1.37	-16.2381
	0.75	-30.5135
	1	-39.4396
	6.02	6.43686
	0.81	16.409
	1.09	-9.41415
	0.5	9.86859
	5.98	-7.71486
	0.65	-2.03384
	0.85	-7.88205
	4.41	-38.124
	1.18	5.19601
	1.03	12.9189
	1.87	-14.2202
	0.7	-2.50923
	0.9	-15.4002
	0.83	12.2983
	0.51	15.0421
	1.41	2.05572
	1.75	37.8986
	1.22	0.969143
	0.79	-3.79427
	1.17	-4.40771
	1.5	-36.6883
	1.05	1.84912
	1.02	-19.8703
	1.01	-34.0239
	1.34	29.6573
	1.58	0.773502
	1.61	-2.08433
	1.25	-29.3656
	0.65	8.39186
	0.8	4.51329
	0.82	4.54161
	0.66	-3.92183
	1.12	12.0163
	0.89	-26.6466
	1.21	-22.1065
	1.21	-15.9835
	1.65	-4.88697
	1.09	-2.6314
	1.23	-24.768
	1.06	-12.4509
	1.87	-22.8309
	1.11	-13.0436
	1.34	40.3795
	1.1	-17.5741
	1.48	-8.15069
	1.21	11.2551
	0.82	-7.91588
	1.28	-4.05278
	1.3	-8.39854
	2.31	12.0019
	2.07	7.93465
	0.74	-13.9205
	1.19	4.11848
	1.67	16.4796
	1.42	26.7352
	0.86	18.2824
	1.27	24.0111
	1.21	-11.3613
	1.12	-5.23038
	0.87	-13.7358
	1.29	-13.6981
	1.49	-12.2072
	1.37	-16.8917
	1.06	20.481
	0.74	15.3033
	1.21	8.5898
	1.01	0.713521
	1.58	5.92509
	1.03	22.7424
	0.89	0.376007
	1.31	-10.1153
	1.64	26.6264
	1.15	17.3776
	1.01	-6.52064
	1.26	-3.34527
	0.79	-9.49209
	1.89	8.00888
	1.58	-1.76418
	1.18	16.1869
	1.27	49.4918
	1.78	-4.49089
	1.11	-15.094
	1.35	-9.3491
	1.29	-18.3267
	1.63	4.33799
	6.53	11.6808
	0.98	16.204
	1.21	17.9043
	1.47	-8.57071
	1.05	2.9919
	1.62	19.3833
	1.52	-12.1861
	1.04	-2.35244
	1.31	3.67516
	3.24	-2.796
	1.25	-5.77196
	1.01	5.63827
	0.94	-9.76846
	1.87	-15.1981
	1.48	-11.9763
	1.23	10.707
	1.25	-28.7198
	1.34	-14.6991
	0.73	-38.9601
	0.62	5.15434
	1.59	-18.9914
	1.08	16.6874
	0.57	-45.9486
	0.74	-6.00773
	1.61	11.67
	0.85	-7.49548
	0.97	-19.1225
	0.92	13.575
	2.03	-41.684
	1.22	7.31428
	1.08	-35.6574
	1.01	-9.85461
	3.48	-4.00457
	1.01	-3.27353
	1.64	-10.2567
	2.51	-6.02931
	2.64	-42.6264
	1.35	11.2098
	1.24	-14.2524
	1.99	-12.9127
	1.53	-6.90547
	3.92	-0.92931
	1.29	-3.13631
	1.58	-13.7376
	1.67	7.69036
	1.34	-24.445
	1.52	-13.7
	1.58	16.6961
	0.87	4.88092
	5.75	-26.8633
	1.82	-10.2463
	1.75	-25.2444
	1.57	1.651
	1.37	25.1102
	1.69	16.7187
	1.06	-34.5903
	1.42	-13.6319
	1.33	-6.42935
	6.23	0.735546
	1.43	2.06518
	3.57	-9.67461
	1.83	-22.8389
	1.97	16.2568
	1.65	24.4637
	1.86	3.61992
	1.41	3.4172
	1.6	-28.894
	0.82	-37.991
	0.95	28.2424
	2.01	-6.16516
	1.3	-30.9142
	1.46	-5.25819
	1.35	-9.42047
	1.61	-13.4556
	1.74	-34.3949
	1.32	0.510162
	0.94	-32.1548
	0.95	-20.7873
	1.29	-21.4029
	1.44	-8.15373
	1.41	-21.2105
	1.46	-8.18874
	1.24	-6.93012
	1.05	-1.83236
	1.42	-2.39372
	1.04	-26.5795
	1.07	-22.924
	0.81	11.4084
	1.03	14.8461
	0.79	10.4327
	1.4	-13.5283
	0.86	4.91583
	2.09	-1.30911
	1.54	16.896
	0.79	-14.5308
	0.82	-10.2497
	0.78	20.1229
	1	11.7481
	0.92	-11.9826
	1.03	16.0507
	0.97	7.48374
	1.3	-9.39864
	0.71	23.4505
	0.76	2.97342
	0.92	0.905024
	0.86	29.845
	0.85	-10.5422
	0.8	32.1429
	0.78	16.3486
	0.62	30.1828
	0.68	-3.95305
	0.78	-24.7625
	0.97	2.82074
	1.37	-29.3576
	1.13	15.1844
	0.86	21.0133
	0.9	9.77951
	1.49	-38.601
	1.76	-27.1986
	1.97	-8.25222
	1.11	40.571
	1.27	25.8078
	1.31	10.153
	1.21	20.2595
	2.22	8.41075
	1.47	0.808657
	1.26	-11.5133
	1.65	-8.98717
	1.02	11.6005
	1.35	39.1975
	0.85	4.33381
	0.81	-2.6941
	1.05	1.50049
	0.87	-32.5631
	1.34	0.85148
	1.32	-18.2047
	1.32	33.3849
	0.94	22.9726
	0.92	19.3809
	0.78	-34.6351
	0.61	-36.9997
	1.8	-23.9293
	1.31	25.1492
	8.91	16.1521
	1.21	2.62364
	0.73	2.04537
	1.09	12.635
	1.03	33.0568
	1.61	-25.9937
	1.14	0.371822
	1	20.3895
	0.63	23.3616
	1.76	-3.31483
	0.86	-3.87336
	1.87	-7.07654
	0.93	24.207
	0.66	12.5996
	1.05	27.2135
	1.75	2.14925
	1.26	-18.7248
	1.13	26.6629
	0.82	27.1712
	0.7	-11.7453
	1.13	-0.62152
	0.87	10.4475
	1.26	-22.5469
	1.27	19.517
	0.98	-8.41816
	0.93	1.83837
	1.51	-32.4698
	1.43	13.2649
	0.93	16.1812
	1.27	1.20153
	0.92	-7.2603
	1.11	-6.3327
	1.63	-13.9693
	0.7	7.91357
	1.18	-9.19274
	1.25	30.4692
	1.3	3.92678
	0.91	-31.1422
	0.8	-11.945
	0.93	-44.5407
	1.18	9.97293
	1.81	12.8862
	1.05	-4.98291
	1.21	23.4981
	1.56	-27.9609
	0.87	22.2581
	1.56	24.128
	0.88	-24.4249
	1.18	-6.29465
	0.83	2.18886
	1.07	17.6687
	0.95	-12.3277
	1.4	16.3504
	0.85	7.53062
	0.88	-23.7376
	1.5	21.6243
	1.21	15.8086
	0.93	-7.68526
	1.01	0.67006
	1.84	6.92134
	0.89	-0.76479
	1.12	2.68136
	1.39	0.633828
	1.65	-0.2113
	0.94	0.042824
	0.92	1.97345
	0.71	0.376475
	0.84	0.189232
	0.68	0.062329
	0.8	-1.02843
	1.17	1.49673
	1.17	-0.19486
	0.85	0.369053
	1.55	0.106521
	1.18	0.934365
	1.15	-0.10908
	1.16	-2.1862
	1.42	-3.13629
	1.53	47.0018
	1.24	-19.5177
	1.05	7.68846
	0.88	29.1264
	1.04	-32.0278
	1.21	-24.4249
	0.93	-8.57992
	1.06	-9.72058
	1.33	5.81469
	0.86	-6.27677
	0.59	-21.7644
	0.84	-0.03906
	0.93	10.5046
	1.03	-1.11596
	1.33	11.8088
	0.81	-1.93458
	1.32	41.5536
	0.91	11.8715
	1.46	6.47252
	0.94	23.5594
	1.76	10.6187
	1.2	-14.8596
	0.86	15.1857
	0.95	-23.4478
	1.32	31.9156
	1.08	38.1055
	0.91	12.0203
	0.86	2.05406
	1.21	-12.7865
	1.38	15.128
	1.21	33.0853
	1.32	-0.81674
	1.3	9.84711
	1.08	18.9419
	1.56	-5.7686
	0.83	-8.76431
	1.28	-12.0033
	0.78	-8.51866
	1.73	-0.6882
	1.63	-27.7263
	1.16	-8.52921
	1.4	-17.7149
	0.94	34.564
	1.26	-9.29196
	0.85	-11.0764
	0.85	-31.3343
	1.25	25.7753
	1.47	-23.605
	1.2	20.3866
	1.1	39.0383
	1.18	-4.13074
	0.95	20.1235
	1.03	-19.3538
	1.34	7.9889
	1.18	7.60162
	0.94	21.5879
	1.1	-21.3391
	0.72	-5.50459
	2.02	28.412
	1.31	19.1738
	1.12	-26.7109
	1.36	39.2033
	1.27	-16.6444
	1.6	6.56284
	2.54	-4.75321
	2.11	34.5763
	1.2	38.2056
	1.92	-18.1896
	1.56	-14.9441
	1.48	-28.8064
	1.7	45.302
	1.55	-27.3611
	1.73	17.1519
	1.72	29.8104
	1.23	-9.98827
	1.09	6.63528
	2.05	-13.6953
	1.33	27.6258
	1.48	-2.38875
	1.29	9.45131
	1.03	-10.5181
	1.46	24.7566
	1.01	16.6058
	1.22	0.016891
	1.26	-1.859
	1.25	-27.1546
	1.69	-8.76518
	1.54	-2.66899
	1.28	4.98822
	1.34	-17.9469
	1.1	34.4637
	1.31	11.9031
	1.02	7.30408
	1.72	-10.7
	1.65	-18.7322
	1.08	-13.0024
	0.63	-3.41661
	1.45	-30.4276
	1.38	10.2278
	1.53	-21.8783
	0.99	9.70452
	1.28	-38.2455
	1.21	33.8215
	1.36	-15.1207
	0.98	18.9691
	1.2	16.6721
	1.52	8.00967
	1.09	3.24715
	1.4	26.1108
	1.08	21.7717
	0.9	-5.22299
	1.46	12.885
	1.21	20.1273
	1.79	-7.55461
	1.41	-4.07518
	1.22	32.5437
	1.52	9.04899
	1.28	-16.6731
	1.11	-14.9381
	1.36	14.5661
	1.63	7.10671
	1.51	9.3489
	1	11.7287
	0.71	15.0401
	0.83	9.89622
	1.17	-5.86807
	1.12	-25.6057
	1.01	-9.78216
	0.94	-5.58371
	1.6	-16.8751
	0.77	-8.21554
	0.78	15.6502
	0.69	-3.93529
	1.47	-11.3702
	1.17	-2.6082
	1.01	-44.6879
	0.84	-7.72312
	1.37	20.9493
	0.85	-8.86031
	0.56	-4.98601
	0.92	13.4193
	0.75	17.2167
	0.83	24.3939
	1.49	13.9245
	1.08	13.9527
	0.57	-17.9827
	1.25	-11.2144
	0.58	11.9275
	0.74	-3.20492
	0.84	23.4612
	1.23	4.3387
	0.86	16.8518
	0.76	20.9129
	0.78	11.3044
	1.07	2.86134
	0.87	6.97874
	0.93	-12.1051
	1.12	-16.6004
	0.63	-5.10585
	0.99	7.11598
	1.36	-1.4078
	0.74	17.9168
	0.63	27.7205
	0.96	11.5983
	0.84	-3.80909
	0.62	-22.4648
	0.63	-16.4587
	0.65	2.46527
	1.21	4.55384
	0.82	-18.5016
	1.33	49.5678
	1.29	27.4208
	0.7	9.25324
	0.62	-17.5887
	0.95	7.94812
	0.69	12.6338
	3.14	-22.2204
	1.44	-41.5037
	0.85	-40.9839
	0.82	3.40858
	1.16	23.1368
	2.22	29.1325
	0.75	20.539
	2.46	-8.0761
	0.83	-23.6934
	0.6	1.76457
	0.78	5.95808
	0.72	21.2184
	1.69	20.9225
	0.61	14.0695
	0.84	15.501
	0.67	13.549
	1.07	8.1232
	0.43	-9.75889
	0.69	-0.72495
	0.85	-13.021
	1.33	34.2865
	0.53	14.2271
	0.57	22.9682
	0.81	11.1692
	0.88	10.3551
	0.78	-3.90414
	0.79	15.6931
	0.59	-9.3951
	1.13	-23.2783
	0.68	-8.18317
	0.61	2.04214
	6.22	-29.5935
	0.65	42.5468
	0.41	3.1181
	0.73	-3.96822
	1.05	2.74329
	0.76	-4.98441
	1.22	-10.5568
	0.62	-5.96212
	1.39	-16.7367
	4.96	-17.1533
	0.54	-21.817
	0.61	-24.7234
	0.53	21.7198
	5.01	-1.76423
	1.14	18.9864
	0.51	15.6524
	0.97	16.5187
	1.92	8.10077
	0.72	-21.414
	1.11	-2.02872
	0.66	-10.1946
	0.48	-2.86806
	0.53	9.30277
	1.73	15.4539
	1.07	17.9422
	1.31	15.1076
	1	-27.7677
	0.91	5.88558
	0.89	-4.35286
	4.82	-13.9248
	0.9	-27.7483
	0.77	-23.4253
	0.93	31.7854
	0.61	50.6193
	1.12	34.6588
	1.14	21.1778
	0.76	-2.66479
	0.67	-9.60936
	0.56	11.018
	5.88	-23.6899
	0.43	12.1068
	0.8	26.0067
	0.75	26.0257
	0.76	9.47604
	0.65	5.73826
	0.63	10.4418
	1.06	-1.98907
	0.7	0.611013
	9.08	-4.43038
	0.72	17.8393
	0.92	7.55618
	0.52	12.4065
	0.64	43.8262
	0.44	5.81999
	0.54	-4.32519
	1.75	11.6616
	0.48	-14.4589
	0.89	-11.2423
	0.58	9.31695
	0.63	2.08474
	1.06	-18.4501
	0.48	-13.0069
	1.4	28.741
	0.88	14.278
	1.18	4.64286
	0.97	-10.9491
	1.1	-6.06126
	0.91	6.02202
	5.85	-13.6054
	0.64	-21.848
	0.98	-2.0139
	0.71	9.91109
	0.4	-3.0542
	6.1	7.67568
	0.56	1.63865
	0.61	-5.076
	0.96	-6.21129
	0.68	12.2277
	0.51	-6.8434
	0.48	-14.2986
	0.92	1.98394
	1.22	14.0108
	0.52	-11.0419
	0.63	-7.06775
	0.6	13.012
	0.69	18.8837
	1.07	18.6137
	0.82	-8.12405
	0.61	-36.0901
	0.59	4.26609
	0.56	-7.53901
	0.56	0.012578
	0.92	12.8657
	0.58	10.1967
	0.61	14.4899
	0.64	-6.19952
	0.6	1.08192
	1.1	-11.3337
	1.78	37.3951
	0.94	22.7885
	0.62	3.42678
	0.41	-7.54456
	7	2.52458
	0.94	-4.4612
	0.69	14.8466
	0.54	13.7256
	0.98	-4.17872
	1.13	9.77056
	0.82	-16.8957
	0.82	-22.1217
	0.59	-1.07651
	0.89	-13.433
	0.85	-4.88201
	0.45	19.113
	1.28	6.99637
	0.92	6.77911
	0.61	-2.81781
	0.83	33.6677
	0.64	14.1846
	0.4	18.2924
	0.63	8.65956
	0.58	7.81837
	0.77	12.2271
	0.72	5.71366
	1.03	6.43298
	0.87	8.69697
	0.94	-15.1257
	1.1	1.70902
	1.13	7.69239
	1.37	12.819
	0.58	-15.1436
	0.56	11.9437
	0.76	15.5977
	0.59	4.9721
	1.1	-2.64441
	1.35	-5.19992
	0.78	-55.3369
	0.66	14.849
	0.94	24.8353
	0.84	-4.14786
	0.64	-26.6167
	1.05	-25.9986
	0.5	-8.74812
	0.96	-21.0447
	0.49	5.33603
	0.61	1.69221
	1.35	-3.68519
	0.46	-7.94421
	0.52	-1.22008
	0.64	-17.1046
	0.51	13.1735
	0.95	7.40717
	0.56	4.52261
	0.5	16.7299
	0.8	5.23841
	0.69	-10.3529
	1.23	4.63832
	1.24	-0.29129
	1.36	-22.6849
	1.22	-4.01428
	1.31	-6.94715
	0.75	-13.1452
	0.69	-5.4122
	0.63	19.584
	1.06	-16.3331
	0.98	4.93539
	0.71	1.47485
	1.09	17.1015
	0.86	-6.46563
	0.64	28.73
	0.64	26.168
	0.33	-4.06124
	0.52	6.38692
	0.72	25.5013
	1.02	3.35279
	0.5	-9.71283
	0.92	4.95911
	0.64	-43.3824
	1.17	-1.25212
	1.33	5.50187
	5.22	19.6292
	0.75	31.2326
	1.05	26.1608
	0.66	-4.04462
	0.65	-11.9555
	0.77	11.189
	1.14	-1.55129
	0.43	-13.349
	0.82	-6.75663
	0.49	15.9919
	0.82	-0.70855
	0.79	10.3315
	0.52	25.8435
	0.79	26.7573
	0.65	26.5299
	0.71	22.4062
	0.5	-0.63237
	0.74	6.44255
	0.6	15.1698
	0.25	13.5342
	0.82	-3.00312
	0.72	27.6606
	0.66	19.6373
	0.67	-4.42881
	0.64	45.529
	0.98	-0.55722
	0.99	37.9812
	1.33	-6.99076
	1.4	-7.19951
	0.63	16.308
	0.98	5.58389
	0.9	17.0918
	0.51	-38.5541
	0.48	3.58931
	0.93	0.638959
	0.89	6.14523
	0.65	-18.5575
	5.52	-21.8235
	1.03	3.45235
	0.38	34.8514
	0.91	13.0655
	0.91	7.87312
	0.96	-0.84951
	0.56	-14.2682
	0.5	-17.7678
	1.07	-3.62549
	0.47	-10.6455
	0.63	-9.05802
	1.18	11.1994
	0.99	14.3474
	0.69	21.543
	0.9	-0.44833
	0.89	-4.81988
	1.21	-20.8868
	0.59	-33.6681
	0.76	12.0931
	0.56	-19.827
	0.71	-11.4269
	1.13	-8.16614
	0.7	24.1963
	0.61	2.54206
	1.16	14.7019
	1.06	5.59411
	0.59	-9.45303
	1.15	-10.6117
	1.31	4.39679
	0.82	-2.49654
	0.88	-20.7061
	0.41	9.02176
	0.67	8.80362
	7.13	0.000416
	0.54	7.85401
	0.58	-12.469
	1.01	-30.9558
	1.13	-28.4658
	0.34	1.44309
	1.17	-4.5894
	0.57	-4.52406
	0.69	22.2736
	0.62	26.4976
	2.04	2.28834
	1.43	22.9288
	0.53	27.7737
	1.26	3.29201
	0.48	11.9261
	0.81	11.4342
	0.65	-14.9604
	1.26	24.2585
	0.64	6.59222
	0.65	47.7883
	0.89	13.1524
	1	-2.79205
	0.49	-7.27289
	0.98	-5.44803
	0.81	-16.844
	1.01	-23.3631
	0.53	-18.3629
	0.43	10.1261
	1	4.24266
	0.81	15.6862
	1.26	-16.9451
	0.55	-22.0061
	1.19	-10.1869
	0.78	-11.2234
	1.36	-13.6434
	0.99	18.7239
	0.9	5.96035
	1.68	4.66997
	0.67	-0.97569
	0.32	-11.7678
	0.6	-22.9366
	1.32	-21.4663
	0.4	9.15048
	0.53	26.3728
	0.66	5.85185
	1.02	-1.15835
	0.64	-10.6008
	0.64	-1.90868
	0.71	0.336303
	0.68	-11.1746
	2.05	15.7942
	0.74	10.2654
	1.14	14.9439
	0.42	-5.10655
	0.8	-9.49885
	0.64	-16.1303
	0.56	11.8604
	1.57	8.37817
	0.86	3.87528
	0.94	-1.60464
	0.59	8.53392
	0.59	-4.19183
	0.57	-1.48945
	0.64	-17.6396
	0.9	-4.89749
	0.97	-2.04188
	0.92	-9.23329
	0.59	31.2463
	0.67	2.28285
	1.83	6.48714
	0.66	11.7377
	0.74	-5.99829
	0.97	8.61668
	0.84	-5.72296
	0.92	-16.8379
	1.74	0.527533
	0.81	17.0796
	5.13	9.16235
	0.46	17.3207
	0.51	9.80694
	0.7	-17.9314
	1.26	10.3562
	0.46	61.3558
	0.49	11.1608
	0.57	3.27152
	0.72	-1.29614
	0.74	-4.21993
	0.42	-12.6838
	1.35	-18.5209
	0.91	-24.156
	0.64	-18.6018
	0.57	2.92593
	0.5	19.7358
	1.12	5.1752
	0.37	1.97038
	0.9	7.0584
	1.29	-14.7326
	0.6	13.3136
	0.49	12.1264
	3.94	8.44623
	1	12.065
	0.58	12.1437
	0.44	2.8952
	1.11	-19.0266
	1.06	-18.8437
	1.01	-20.7351
	1.19	21.9781
	1.09	2.48767
	1.39	-7.78011
	1.33	-24.4614
	1.09	-30.7944
	0.85	-3.92744
	0.92	1.55831
	0.98	13.5328
	0.38	25.4446
	1.12	29.2923
	1.24	15.1255
	1.03	20.3348
	0.45	-4.41749
	0.31	-8.2114
	0.74	3.63391
	0.62	-7.3551
	0.74	11.6207
	0.73	0.266154
	0.86	0.971953
	0.71	5.00923
	0.95	8.13626
	0.78	29.0004
	0.65	13.9236
	0.64	11.8364
	0.92	-1.01099
	0.85	-14.1705
	0.48	10.2519
	0.57	21.825
	0.59	8.84657
	1.11	-10.6506
	0.83	0.499911
	0.58	21.6303
	0.92	21.8489
	0.57	4.08102
	7.26	4.64539
	0.65	-0.30334
	0.81	-10.6385
	0.85	20.298
	0.89	-10.2347
	0.91	7.98488
	0.44	-4.14833
	6.31	9.3898
	1.34	7.98304
	0.81	9.21246
	0.82	23.4893
	0.97	-7.6248
	0.89	1.77299
	0.9	8.77826
	0.64	10.5934
	1.32	-2.23525
	2.97	11.2149
	0.52	3.45382
	0.52	7.9121
	0.49	-11.0089
	0.58	-6.02891
	1.02	12.5931
	0.35	23.4239
	0.57	5.72938
	0.41	17.0894
	0.85	12.8256
	0.8	7.33992
	1.39	12.3433
	1.11	24.9546
	1.07	3.38574
	2.16	13.4214
	0.87	2.26915
	0.67	-4.85233
	0.94	29.9272
	1.65	-31.8485
	0.88	-12.7929
	0.85	8.64517
	1.19	28.8566
	1.04	8.20071
	0.55	1.47974
	0.68	11.1157
	1.12	-8.26116
	0.57	1.76103
	1.05	-13.4846
	0.69	4.26656
	1.13	16.2039
	0.94	5.69332
	0.95	-2.98486
	0.89	16.7887
	0.47	5.0331
	0.91	10.3243
	0.69	-4.83072
	0.96	-9.72707
	0.99	2.03216
	0.51	4.35572
	1.08	6.0336
	1.44	18.2887
	1.06	2.18182
	0.45	-2.61503
	0.92	19.5878
	0.92	13.0048
	0.76	-5.62877
	0.91	-1.33431
	1.01	-2.98992
	1.08	25.1773
	0.89	-14.8643
	0.88	9.63239
	0.56	16.1379
	1.15	-12.2722
	1	6.3012
	1.62	10.893
	0.85	3.2552
	0.87	-5.41907
	0.83	3.37981
	0.96	5.55141
	7.57	-1.49531
	0.53	8.98521
	1.48	-2.10676
	0.54	16.179
	0.69	8.9317
	0.77	-2.3639
	0.72	10.1471
	0.86	2.3062
	0.82	-12.1977
	0.88	6.01992
	0.99	12.2025
	2.11	12.5096
	0.94	15.6676
	1.01	-50.6113
	1.99	-8.23677
	0.6	-4.92442
	1.35	4.87934
	0.78	14.0219
	0.55	-22.2252
	0.78	-2.34294
	0.29	9.17308
	0.72	-23.7038
	0.3	-34.0106
	0.7	11.0625
	0.83	-13.0353
	1.61	-10.4481
	1.04	5.01018
	0.64	19.7284
	1.15	24.4948
	1.01	-13.7584
	0.63	3.70605
	0.83	-4.25623
	0.82	8.00815
	0.98	11.2304
	0.97	19.8194
	0.48	12.4259
	0.44	-6.73874
	0.93	20.7783
	0.78	-9.30183
	1.02	17.5684
	1.05	-4.72854
	0.89	2.12033
	0.81	7.29389
	0.47	11.2737
	0.93	0.027648
	0.8	-3.29174
	0.84	-31.8145
	0.47	10.0616
	0.5	-2.17066
	0.89	10.6147
	0.55	36.4582
	0.58	-19.4052
	0.79	-1.61791
	0.84	3.34957
	0.69	9.21677
	0.73	13.8427
	0.95	-5.73776
	0.82	-0.34714
	0.87	-9.69674
	0.47	26.6601
	0.66	27.1273
	0.35	-13.0528
	0.92	-0.90212
	0.96	11.3515
	7.03	7.03177
	0.27	-3.0464
	0.97	-0.47893
	1.18	9.68237
	0.71	24.357
	0.57	17.0267
	0.89	1.77299
	0.9	8.77826
	0.64	10.5934
	1.32	-2.23525
	2.97	11.2149
	0.52	3.45382
	0.52	7.9121
	0.49	-11.0089
	0.58	-6.02891
	1.02	12.5931
	0.35	23.4239
	0.57	5.72938
	0.41	17.0894
	0.85	12.8256
	0.8	7.33992
	1.39	12.3433
	1.11	24.9546
	1.07	3.38574
	2.16	13.4214
	0.87	2.26915
	0.67	-4.85233
	0.94	29.9272
	1.65	-31.8485
	0.88	-12.7929
	0.85	8.64517
	1.19	28.8566
	1.04	8.20071
	0.55	1.47974
	0.68	11.1157
	1.12	-8.26116
	0.57	1.76103
	1.05	-13.4846
	0.69	4.26656
	1.13	16.2039
	0.94	5.69332
	0.95	-2.98486
	0.89	16.7887
	0.47	5.0331
	0.91	10.3243
	0.69	-4.83072
	0.96	-9.72707
	0.99	2.03216
	0.51	4.35572
	1.08	6.0336
	1.44	18.2887
	1.06	2.18182
	0.45	-2.61503
	0.92	19.5878
	0.92	13.0048
	0.76	-5.62877
	0.91	-1.33431
	1.01	-2.98992
	1.08	25.1773
	0.89	-14.8643
	0.88	9.63239
	0.56	16.1379
	1.15	-12.2722
	1	6.3012
	1.62	10.893
	0.85	3.2552
	0.87	-5.41907
	0.83	3.37981
	0.96	5.55141
	7.57	-1.49531
	0.53	8.98521
	1.48	-2.10676
	0.54	16.179
	0.69	8.9317
	0.77	-2.3639
	0.72	10.1471
	0.86	2.3062
	0.82	-12.1977
	0.88	6.01992
	0.99	12.2025
	2.11	12.5096
	0.94	15.6676
	1.01	-50.6113
	1.99	-8.23677
	0.6	-4.92442
	1.35	4.87934
	0.78	14.0219
	0.55	-22.2252
	0.78	-2.34294
	0.29	9.17308
	0.72	-23.7038
	0.3	-34.0106
	0.7	11.0625
	0.83	-13.0353
	1.61	-10.4481
	1.04	5.01018
	0.64	19.7284
	1.15	24.4948
	1.01	-13.7584
	0.63	3.70605
	0.83	-4.25623
	0.82	8.00815
	0.98	11.2304
	0.97	19.8194
	0.48	12.4259
	0.44	-6.73874
	0.93	20.7783
	0.78	-9.30183
	1.02	17.5684
	1.05	-4.72854
	0.89	2.12033
	0.81	7.29389
	0.47	11.2737
	0.93	0.027648
	0.8	-3.29174
[truncated: 4,339 more rows]

## Sheet: Figure 3D
rILN Photometry Signal Z-Score
	Reinfor. -0.5s	Reinfor. 0.5s	Unreinfor. -0.5s	Unreinfor. 0.5s
	-0.15068	0.503283	0.027427	0.024021
	-0.20661	0.328229	-0.06921	-0.25696
	-0.30319	0.413744	-0.25339	-0.41854
	0.025324	0.132319	0.207259	-0.05851
	-0.45838	0.294724	-0.18359	-0.37712
	-0.54481	0.590494	-0.02773	0.169549
	-0.25429	0.709202	-0.13566	-0.13154
	-0.19575	0.075824	0.099673	0.013171
	-0.19833	0.339646	-0.20285	-0.06939
	-0.13262	0.189451	0.025699	-0.00256
	-0.55839	0.292512	0.114002	0.061277
	-0.05222	0.409445	0.037076	-0.03845
	0.170803	0.409345	0.212975	-0.01588

## Sheet: Figure 3E
rILN Photometry Signal Z-Score
	FR1 -.9	FR1 +.7	FR5-NTL -.9	FR5-NTL+.7	FR5-10s -.9	FR5-10s +.7
	-0.38049	-0.15817	-0.10466	-0.24927	-0.03126	0.012159
	-0.09757	-0.1858	-0.57132	-0.35168	-0.36662	-0.37489
	0.003775	-0.06542	-0.03879	-0.1882	-0.17651	-0.5101
	-0.18133	-0.07962	0.303634	-0.2143	0.324212	-0.08311
	0.100178	-0.08547	-0.02309	0.001309	-0.11521	-0.3802
	0.026339	0.141337	0.220888	0.305305	-0.05	-0.05331
	-0.44025	-0.23097	0.014209	-0.32644	-0.04374	-0.06962
	-0.08314	-0.35367	-0.04918	-0.37348	0.003846	-0.30853
	0.178833	-0.03053	0.124552	-0.09916	0.158172	-0.09548
	0.274352	0.239785	0.092793	-0.25983	0.156187	-0.39343
	-0.18855	-0.00528	-0.46227	-0.06905	-0.2282	-0.05762
	-0.03172	0.341451	0.188576	-0.18389	-0.16648	-0.16021
	-0.05843	0.290065	0.469448	-0.04978	0.264472	0.286221

## Sheet: Figure 3F
rILN Photometry Signal Z-Score
	Reward -1s	Reward 1s	Non-reward -1s	Non-reward 1s
	-0.01568	0.393247	0.098483	0.104322
	-0.16874	0.360987	-0.2594	0.095618
	0.161398	0.372879	-0.22997	-0.31804
	0.21185	0.422749	0.06935	0.199613
	0.034199	0.274856	0.060746	-0.02336
	-0.32001	0.577413	-0.18243	-0.30932

## Sheet: Figure 3G
rILN Photometry Signal Z-Score
	-1.3 s	0.5 s
	-0.19057	0.183487
	-0.00451	0.040574
	-0.04485	0.021907
	0.048685	0.249114
	0.001113	0.036722
	0.081586	-0.01819
	-0.0775	0.240344
	-0.2837	0.084884
	0.080264	-0.08153
	-0.02282	-0.07475
	-0.03124	0.136727
	-0.14107	0.015806
	-0.00872	0.053245
	-0.00872	0.053245
	0.009509	0.120417
	-0.01762	0.068513
	0.097408	0.117075
	0.014283	0.050626
	-0.06134	0.254659

## Sheet: Figure 3H
Head entry latency (s)
	Valued	Devalued
	7.005	17.2867
	15.235	34.81
	23.47	67.1367
	13.695	108.563
	3.605	14.95
	6.705	25.2633
	6.075	62.57
	6.675	53.9233
	12.485	43.4633
	9.045	12.4167
	3.29	13.5333
	3.285	18.61

## Sheet: Figure 3I
Number of head entries in 30 min
	Valued	Devalued
	233.5	162.667
	129	64.3333
	99	54.6667
	139.5	57.3333
	396.5	242.333
	235.5	118.333
	419.5	59.6667
	213.5	51.3333
	153	84
	169.5	107
	478.5	301
	466.5	270

## Sheet: Figure 3J
rILN Photometry Signal Z-Score
	Valued -.5s	Valued .5s	Deval -.5s	Deval +.5s
	-0.38055	0.272358	-0.4517	0.433117
	0.083298	1.2916	-0.15583	0.257878
	0.028083	-0.39413	0.466887	0.299839
	0.078342	0.813197	-0.03199	0.56749
	-0.21972	-0.14248	0.0566	-0.12668
	-0.07241	0.823829	0.082591	0.215061
	-0.2518	0.630076	0.078412	0.971503
	-0.04456	0.174249	0.065741	0.246059
	-0.05006	0.096272	0.255168	0.125704
	-0.08332	0.596682	-0.08233	0.605383
	-0.19657	0.39773	0.214996	1.23224
	0.183527	0.514791	0.168161	0.558186
