# Supplementary material for: The rostral intralaminar nuclear complex of the thalamus supports striatally mediated action reinforcement
Source: eLife. 2023 Apr 6;12:e83627. doi: 10.7554/eLife.83627 (PMC10079292; doi:10.7554/eLife.83627)
Supplement: Figure 4—source data 1. [file elife-83627-fig4-data1.xlsx]

## Sheet: Figure 4C
	% Correct No Light			% Correct Light
	eYFP	NpHR-eYFP		eYFP	NpHR-eYFP
	32.325	55.4825		27.075	49.835
	31.1925	34.005		34.215	25.145
	49.58	29.04		52.8325	17.815
	44.105	52.9425		47.1175	59.4325
	41.485	28.4675		38.1375	22.8925
	34.2775	42.43		32	27.375
		46.285			42.3925
	55.8275	38.5475		53.75	21.9
	33.6275	39.81		28.6075	40.525
	45.4325	46.5675		39.9125	40.5925
	52.65	38.4025		52.155	26.5175
	43.655	38.39		31.33	41.045
	42.48	31.0075		30	16.685
	39.4925	35.6225		36.18	24.785
		66.8825			56.1625

## Sheet: Figure 4D
	% Omitted trials No Light			% Omitted trials Light
	eYFP	NpHR-eYFP		eYFP	NpHR-eYFP
	50.05	16.905		50.015	22.8475
	51.4125	46.4225		47.81	50.305
	35.7225	57.775		28.545	64.8
	35.9925	16.6025		35.035	16.185
	38.635	48.3875		47.135	57.755
	42.055	38.37		42.3975	43.83
		24.84			30.08
	33.9375	48.415		34.1975	61.95
	48.0725	27.645		46.6675	31.9025
	31.7675	23.2525		33.72	35.29
	19.925	32.425		26.1325	41.84
	41.3225	41.7125		43.835	38.06
	31.43	39.6375		32.8425	43.96
	37.11	22.89		30.425	29.425
		20.0875			30.1025

## Sheet: Figure 4E
	% incomplete trials No Light			% incomplete trials Light
	eYFP	NpHR-eYFP		eYFP	NpHR-eYFP
	17.625	27.6125		22.91	27.3175
	17.395	19.575		17.975	24.5575
	14.695	13.185		18.6225	17.3875
	19.905	30.455		17.8475	24.38
	19.88	23.1475		14.7325	19.3525
	23.6675	19.195		25.605	28.795
		28.8775			27.53
	10.235	13.04		12.0525	16.15
	18.3025	32.545		24.7225	27.5725
	22.7975	30.185		26.3625	24.1175
	27.4275	29.1775		21.715	31.6425
	15.0225	19.895		24.8375	20.895
	26.09	29.36		37.155	39.3525
	23.3975	41.485		33.3925	45.785
		13.0325			13.735

## Sheet: Figure 4H
	% Correct No Light			% Correct Light
	eYFP	ChR2-eYFP		eYFP	ChR2-eYFP
	47.687	21.072		45.472	41.004
	28.985	19.685		35.288	49.113
	33.13	31.575		54.914	52.485
	32.575	37.382		35.75	47.84
	39.547	28.573		45.395	46.5
	38.635	23.165		40.21	34.455
	43.907	33.52		44.015	43.357
		22.08			37.058
	25.968	38.938		28.182	52.797
	48.133	41.975		44.028	48.613
	50.378	33.365		44.732	37.413
	35.968	47.032		29.188	65.372
		40.778			52.362
		41.52			50.437
		28.505			47.865
		40.567			35.877

## Sheet: Figure 4I
	% Omitted trials No Light			% Omitted trials Light
	eYFP	ChR2-eYFP		eYFP	ChR2-eYFP
	28.997	47.66		31.115	32.322
	39.352	46.75		39.38	24.203
	51.222	44.137		35.746	24.417
	39.263	20.588		32.4	16.152
	26.19	46.853		27.002	32.583
	40.445	59.975		38.445	44
	35.723	46.397		33.725	26.407
		45.303			31.698
	54.887	22.085		52.85	17.728
	24.012	21.075		29.518	11.458
	27.22	47.553		29.563	45.127
	46.013	31.193		48.092	17.93
		31.413			24.042
		35.935			28.887
		55.348			28.678
		40.15			34.11

## Sheet: Figure 4J
	% incomplete trials No Light			% incomplete trials Light
	eYFP	ChR2-eYFP		eYFP	ChR2-eYFP
	23.317	31.27		23.413	26.676
	30.568	33.562		26.267	26.683
	15.648	24.288		9.34	23.1
	28.162	42.033		31.855	36.013
	34.265	24.572		27.603	20.917
	22.015	16.86		20.407	21.545
	20.375	20.083		22.262	30.233
		32.613			31.243
	19.145	38.978		18.967	29.473
	27.855	36.953		26.453	39.928
	22.4	19.078		25.708	17.462
	18.018	21.777		22.723	16.698
		27.807			23.592
		22.545			20.678
		16.148			23.458
		19.285			30.015
